# Supplementary material for: Divergent Selection on Opsins Drives Incipient Speciation in Lake Victoria Cichlids
Source: PubMed Central journal article supplement (PMC1750929; doi:10.1371/journal.pbio.0040433), 2006-12-05

| nucleotide sites        |       | 4 | 5 | 5 | 5 | 8 | 8 |
|-------------------------|-------|---|---|---|---|---|---|
| syn/non-syn             |       | s | n | n | n | n | n |
| <i>N. rufocaudalis</i>  | 11720 | T | C | G | G | T | G |
|                         | 14574 | . | . | . | . | . | . |
|                         | 12124 | . | . | . | . | . | . |
|                         | 12125 | . | . | . | . | . | . |
|                         | 14562 | . | . | . | . | . | . |
|                         | 10982 | . | . | . | . | . | . |
|                         | 10990 | . | S | K | K | . | . |
|                         | 10988 | . | . | . | . | . | . |
|                         | 10722 | Y | . | . | . | . | . |
|                         | 10726 | . | . | . | . | . | . |
|                         | 10731 | . | . | . | . | . | . |
|                         | 10733 | . | . | . | . | . | . |
|                         | 10734 | . | . | . | . | . | . |
|                         | 11296 | . | . | . | . | . | . |
|                         | 11300 | . | . | . | . | . | . |
|                         | 11329 | . | . | . | . | . | . |
|                         | 11142 | . | . | . | . | . | . |
|                         | 11144 | . | . | . | . | . | . |
|                         | 11158 | . | . | . | . | . | . |
|                         | 11160 | . | . | . | . | . | . |
|                         | 15184 | . | . | . | . | . | . |
|                         | 14859 | . | . | . | . | . | . |
|                         | 15000 | . | . | . | . | . | . |
|                         | 10085 | . | . | . | . | . | . |
|                         | 10747 | . | . | . | . | . | . |
|                         | 10784 | . | . | . | . | . | . |
|                         | 10795 | . | . | . | . | . | . |
|                         | 10796 | . | . | . | . | . | . |
|                         | 10798 | . | . | . | . | . | . |
|                         | 11210 | Y | . | . | . | . | . |
|                         | 11211 | . | . | . | . | . | . |
|                         | 11223 | . | . | . | . | . | . |
|                         | 11249 | . | . | . | . | . | . |
|                         | 11251 | . | . | . | . | . | . |
|                         | 11252 | . | . | . | . | . | . |
|                         | 11269 | . | . | K | K | W | K |
|                         | 11270 | . | . | . | . | . | . |
|                         | 11271 | . | . | . | . | . | . |
|                         | 11272 | . | . | . | . | . | . |
|                         | 11273 | . | . | . | . | . | . |
|                         | 11274 | . | . | . | . | . | . |
|                         | 11275 | . | . | K | K | W | K |
|                         | 11276 | . | . | . | . | . | . |
|                         | 11278 | . | . | . | . | . | . |
| <i>N. omnicaeruleus</i> | Ma    | . | . | . | . | . | . |
| <i>N. greenwoodi</i>    | Mr    | . | . | T | T | A | T |

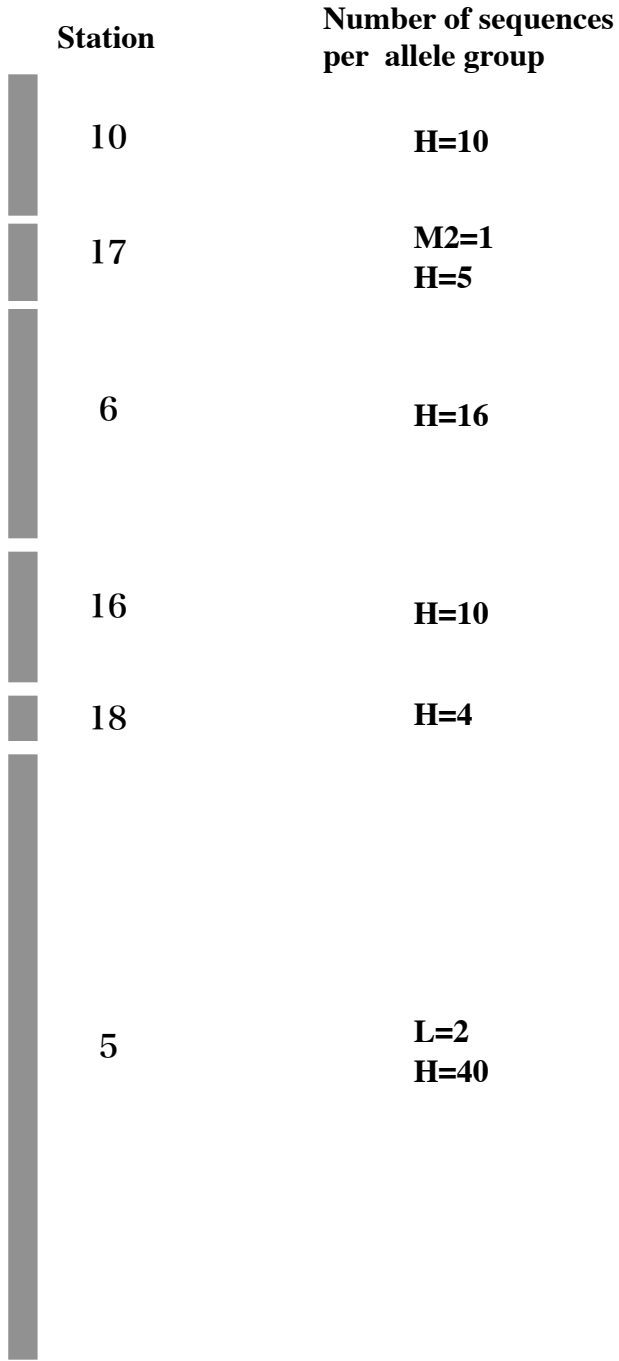

Supplement: pbio.0040433.sg004.pdf [file pbio.0040433.sg004.pdf]
