# Supplementary material for: Divergent Selection on Opsins Drives Incipient Speciation in Lake Victoria Cichlids
Source: PLoS Biol. 2006 Dec 5;4(12):e433. doi: 10.1371/journal.pbio.0040433 (PMC1750929; doi:10.1371/journal.pbio.0040433)
Supplement: Figure S8 — (15 KB PDF) [file pbio.0040433.sg008.pdf]

**LWSB\_LF: 5'-CCTCACTCTTCTGATTTATTCACAGCTCAT-3'**

**LWSB\_F1: 5'-AACTCTGTAAACCCTTTGCAA-3'**

**LWSB\_F2: 5'-TGTGGAGGAACCTGAGTTGT-3'**

**LWSB\_F3: 5'-AACATTGTTGCTGCCACTGA-3'**

**LWSB\_F4: 5'-TGTTAACGTGTGAAGTTGGATTTC-3'**

**LWSB\_F5: 5'-CAGTTCAGGGTTATTGCTTTGC-3'**

**LWS\_F1: 5'-GCGGTATCATGAAGATTCAACCA-3'**

**LWS\_F4: 5'-TTGCTGCAAGGCGGTATCAT-3'**

**LWS\_F7: 5'-CTGTGGTGCTGTTAGTGATTCTG-3'**

**LWS\_F8: 5'-AAGTCTCCAGGATGGTCGTTGT-3'**

**LWSB\_F8: 5'-AATGAAACAGCAGCAAGGCTA-3'**

**LWSB\_F9: 5'-ATGACACAGCATGGATGACAG-3'**

**LWSB\_F10: 5'-AGCTTCAATAGTCGTCCTCTTTG-3'**

**LWSB\_F11: 5'-GGATGAGACACAAAAGATCAAC-3'**

**LWSB\_F12: 5'-GTCAACAACCTGAAACCTGCACT-3'**

**LWSB\_F15: 5'-CAATGTCTGACTGTGATTAGTTCA-3'**

**LWSB\_R1: 5'-CTTCTCTCCTGCTGTACAGATGT-3'**

**LWSB\_R2: 5'-CCGTGAATGTCTAACCTATTTGAC-3'**

**LWSB\_R3: 5'-CACTGTGTGTTACTAGCAAAGCA-3'**

**LWSB\_R4: 5'-CTGAACGCAATCTGTCTAAAGTC-3'**

**LWSB\_R5: 5'-GCTTGGTGCTACAGATCTGACT-3'**

**LWS\_R1: 5'-GGAGACTTCGGAGCCATCATC-3'**

**LWS\_R4: 5'-CAGTCCATGAGGCCAGTACCTA-3'**

**LWSB\_R8: 5'-GAAATCTGACACTAGCTCACTGCT-3'**

**LWSB\_R9: 5'-CAATACTGTCCTATGTTGGCAA-3'**

**LWSB\_R10: 5'-GAACAGCAAACACTACCAGAATG-3'**

**LWSB\_R12: 5'-CATCCTCACAAATCAGATTAGCA-3'**

**LWSB\_R13: 5'-TGTGGATCTTTCACCTGGCTACA-3'**

**LWSB\_R14: 5'-CGATAGTCAAATGTCTGAGTCAGT-3'**

**LWSB\_LR: 5'-TCATTGTGGCATCACTGGTCTAGTCA-3'**

**Eco6LWS: 5'-CACAGAATTTCGCCACCATGGCAGAAGAGTGGGGAAAACAAAGTT-3'**

**LWS\_Flag\_stop\_NotI: 5'-CACAGCGGCCGCTTACTTGTCATCGTCGTCCTTGTAGTCTGCGGGAGCCACAGAGGAGACCT-3'**
