# Supplementary material for: Divergent Selection on Opsins Drives Incipient Speciation in Lake Victoria Cichlids
Source: PubMed Central journal article supplement (PMC1750929; doi:10.1371/journal.pbio.0040433), 2006-12-05

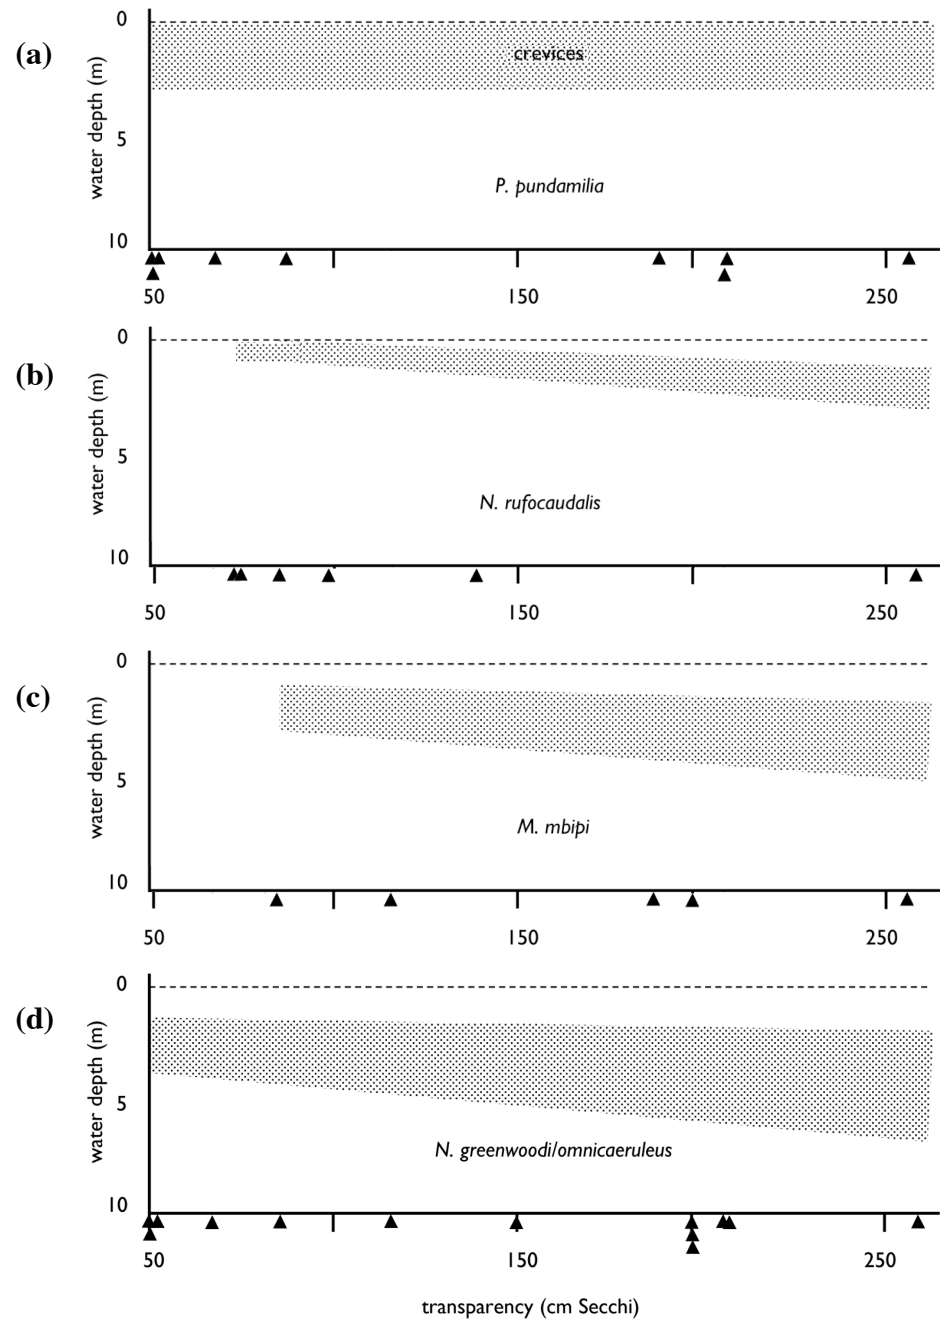

Supplement: pbio.0040433.sg001.pdf [file pbio.0040433.sg001.pdf]
