# Supplementary material for: Divergent Selection on Opsins Drives Incipient Speciation in Lake Victoria Cichlids
Source: PubMed Central journal article supplement (PMC1750929; doi:10.1371/journal.pbio.0040433), 2006-12-05
Supplement: pbio.0040433.sg002.pdf [file pbio.0040433.sg002.pdf]

| nucleotide sites | 1 | 4 | 4 | 5 | 5 | 5 | 6 | 8 | 8 | 8 | Station | Species                  | Number of sequences<br>per allele group |      |     |
|------------------|---|---|---|---|---|---|---|---|---|---|---------|--------------------------|-----------------------------------------|------|-----|
| syn/non-syn      | n | n | s | n | n | n | n | n | n | n |         |                          |                                         |      |     |
| Mr1              | C | T | T | C | T | T | G | A | T | A | (2)     | ( <i>N. greenwoodi</i> ) |                                         |      |     |
| Mr16             | . | . | . | . | . | . | . | . | . | . | (2)     | ( <i>N. greenwoodi</i> ) |                                         |      |     |
| Mr19             | . | . | . | . | . | . | . | . | . | . | (2)     | ( <i>N. greenwoodi</i> ) |                                         |      |     |
| Mr20             | . | . | . | . | . | . | . | . | . | . | (2)     | ( <i>N. greenwoodi</i> ) |                                         |      |     |
| Mr21             | . | . | . | . | . | . | . | . | . | . | (2)     | ( <i>N. greenwoodi</i> ) |                                         |      |     |
| Mr22             | . | . | . | . | . | . | . | . | . | . | (2)     | ( <i>N. greenwoodi</i> ) |                                         |      |     |
| Mr23             | . | . | . | . | . | . | . | . | . | . | (2)     | ( <i>N. greenwoodi</i> ) |                                         |      |     |
| Mr24             | . | . | . | . | . | . | . | . | . | . | (2)     | ( <i>N. greenwoodi</i> ) |                                         |      |     |
| Mr25             | . | . | . | . | . | . | . | . | . | . | (2)     | ( <i>N. greenwoodi</i> ) |                                         |      |     |
| Mr26             | . | . | . | . | . | . | . | . | . | . | (2)     | ( <i>N. greenwoodi</i> ) |                                         |      |     |
| Mr27             | . | . | . | . | . | . | . | . | . | . | (2)     | ( <i>N. greenwoodi</i> ) |                                         |      |     |
| Mr28             | . | . | . | . | . | . | . | . | . | . | (2)     | ( <i>N. greenwoodi</i> ) |                                         |      |     |
| Mr29             | . | . | . | . | . | . | . | . | . | . | (2)     | ( <i>N. greenwoodi</i> ) |                                         |      |     |
| Mr3              | . | . | . | . | . | . | . | . | . | . | (2)     | ( <i>N. greenwoodi</i> ) |                                         | L=57 |     |
| Mr30             | . | . | . | . | . | . | . | . | . | . | (2)     | ( <i>N. greenwoodi</i> ) |                                         |      | H=1 |
| Mr31             | . | . | . | . | . | . | . | . | . | . | (2)     | ( <i>N. greenwoodi</i> ) |                                         |      |     |
| Mr4              | . | . | . | . | . | . | . | . | . | . | (2)     | ( <i>N. greenwoodi</i> ) |                                         |      |     |
| Mr5              | . | . | . | . | . | . | . | . | . | . | (2)     | ( <i>N. greenwoodi</i> ) |                                         |      |     |
| Mr6              | . | . | . | . | K | K | . | W | K | . | (2)     | ( <i>N. greenwoodi</i> ) |                                         |      |     |
| Mr7              | . | . | . | . | . | . | . | . | . | . | (2)     | ( <i>N. greenwoodi</i> ) |                                         |      |     |
| MrVBL1           | . | . | . | . | . | . | . | . | . | . | (2)     | ( <i>N. greenwoodi</i> ) |                                         |      |     |
| MrVBL2           | . | . | . | . | . | . | . | . | . | . | (2)     | ( <i>N. greenwoodi</i> ) |                                         |      |     |
| MrVBL3           | . | . | . | . | . | . | . | . | . | . | (2)     | ( <i>N. greenwoodi</i> ) |                                         |      |     |
| MrVBL4           | . | . | . | . | . | . | . | . | . | . | (2)     | ( <i>N. greenwoodi</i> ) |                                         |      |     |
| MrVBL5           | . | . | . | . | . | . | . | . | . | . | (2)     | ( <i>N. greenwoodi</i> ) |                                         |      |     |
| MrVBL6           | . | . | . | . | . | . | . | . | . | . | (2)     | ( <i>N. greenwoodi</i> ) |                                         |      |     |
| MrVBL7           | . | . | . | . | . | . | . | . | . | . | (2)     | ( <i>N. greenwoodi</i> ) |                                         |      |     |
| MrVBL8           | . | . | . | . | . | . | . | . | . | . | (2)     | ( <i>N. greenwoodi</i> ) |                                         |      |     |
| MrVBL9           | . | . | . | . | . | . | . | . | . | . | (2)     | ( <i>N. greenwoodi</i> ) |                                         |      |     |
| Mt1              | . | . | . | . | . | . | . | . | . | . | (3)     | ( <i>N. greenwoodi</i> ) |                                         |      |     |
| Mt2              | . | . | . | . | . | . | . | . | . | . | (3)     | ( <i>N. greenwoodi</i> ) |                                         |      |     |
| Mt3              | . | . | . | . | . | . | . | . | . | . | (3)     | ( <i>N. greenwoodi</i> ) |                                         |      |     |
| Mt4              | . | . | . | . | . | . | . | . | . | . | (3)     | ( <i>N. greenwoodi</i> ) |                                         |      |     |
| Mt6              | . | . | . | . | . | . | . | . | . | . | (3)     | ( <i>N. greenwoodi</i> ) | L=10                                    |      |     |
| Py27             | . | . | . | G | . | . | . | T | G | . | (5)     | ( <i>N. greenwoodi</i> ) |                                         |      |     |
| Py9              | . | . | . | G | . | . | . | T | G | . | (5)     | ( <i>N. greenwoodi</i> ) |                                         | L=5  |     |
| PyVb11           | . | K | . | . | . | . | . | . | . | . | (5)     | ( <i>N. greenwoodi</i> ) |                                         |      |     |
| PyVBL2           | . | . | . | . | . | . | . | . | . | . | (5)     | ( <i>N. greenwoodi</i> ) |                                         |      |     |
| PyVBL3           | . | . | . | . | K | K | . | W | K | . | (5)     | ( <i>N. greenwoodi</i> ) |                                         |      |     |
| PyVBL5           | . | . | . | S | K | K | . | T | G | . | (5)     | ( <i>N. greenwoodi</i> ) |                                         | M2=6 |     |
| PyVBL6           | . | . | . | S | K | K | . | T | G | . | (5)     | ( <i>N. greenwoodi</i> ) | H=3                                     |      |     |
| Hic              | G | . | S | . | K | G | . | T | G | . | (7)     | ( <i>N. greenwoodi</i> ) |                                         |      |     |
| Hid              | . | . | . | . | G | G | . | T | G | . | (7)     | ( <i>N. greenwoodi</i> ) |                                         | M2=5 |     |
| Hie              | . | . | . | . | K | G | . | T | G | . | (7)     | ( <i>N. greenwoodi</i> ) |                                         |      |     |
| HiVb11           | . | . | . | S | . | K | . | T | G | . | (7)     | ( <i>N. greenwoodi</i> ) |                                         |      |     |
| HiVb12           | . | . | Y | . | K | G | . | T | G | . | (7)     | ( <i>N. greenwoodi</i> ) |                                         | H=5  |     |

|       |         |         |       |      |                          |       |
|-------|---------|---------|-------|------|--------------------------|-------|
| Bw13  | . . . S | K K .   | T G . | (9)  | ( <i>N. greenwoodi</i> ) |       |
| Bw16  | . . . . | G G .   | W K R | (9)  | ( <i>N. greenwoodi</i> ) | M1=1  |
| Bw2   | . . . G | . . .   | T G . | (9)  | ( <i>N. greenwoodi</i> ) |       |
| Bw32  | . . . G | . . .   | T G . | (9)  | ( <i>N. greenwoodi</i> ) | M2=10 |
| Bw33  | . . . G | . . .   | T G . | (9)  | ( <i>N. greenwoodi</i> ) |       |
| Bw39  | . . . G | . . .   | T G . | (9)  | ( <i>N. greenwoodi</i> ) | H=3   |
| Bw4   | . . . S | K K .   | T G . | (9)  | ( <i>N. greenwoodi</i> ) |       |
| Ig    | . . . S | K K .   | T G . | (11) | ( <i>N. greenwoodi</i> ) |       |
| Ig42  | . . . Y | . G G . | T G . | (11) | ( <i>N. greenwoodi</i> ) |       |
| Ig43  | . . . . | G G .   | T G . | (11) | ( <i>N. greenwoodi</i> ) |       |
| Ig44  | . . . . | G G .   | T G . | (11) | ( <i>N. greenwoodi</i> ) |       |
| Ig45  | . . . . | G G .   | T G . | (11) | ( <i>N. greenwoodi</i> ) | M2=5  |
| Ig46  | . . . C | . G G . | T G . | (11) | ( <i>N. greenwoodi</i> ) |       |
| Ig47  | . . . S | K K .   | T G . | (11) | ( <i>N. greenwoodi</i> ) | H=17  |
| Ig48  | . . . S | K K .   | T G . | (11) | ( <i>N. greenwoodi</i> ) |       |
| IgF   | . . . Y | . G G . | T G . | (11) | ( <i>N. greenwoodi</i> ) |       |
| IgMB  | . . . S | K K .   | T G . | (11) | ( <i>N. greenwoodi</i> ) |       |
| IgMC  | . . . S | K K .   | T G . | (11) | ( <i>N. greenwoodi</i> ) |       |
| Se17  | . . . Y | . G G . | T G . | (13) | ( <i>N. greenwoodi</i> ) |       |
| Se27  | . . . . | G G .   | T G . | (13) | ( <i>N. greenwoodi</i> ) | M2=1  |
| Se33  | . . . S | K K .   | T G . | (13) | ( <i>N. greenwoodi</i> ) |       |
| Se5   | . . . . | G G .   | T G . | (13) | ( <i>N. greenwoodi</i> ) | H=7   |
| So1   | . . . . | G G .   | T G . | (14) | ( <i>N. greenwoodi</i> ) |       |
| So15  | . . . . | G G .   | T G . | (14) | ( <i>N. greenwoodi</i> ) |       |
| So3   | . . . . | G G .   | T G . | (14) | ( <i>N. greenwoodi</i> ) | H=8   |
| So69  | . . . . | G G .   | T G . | (14) | ( <i>N. greenwoodi</i> ) |       |
| Nm1   | . . . C | . G G . | T G . | (15) | ( <i>N. greenwoodi</i> ) |       |
| Nm10  | . . . . | G G .   | T G . | (15) | ( <i>N. greenwoodi</i> ) |       |
| Nm23  | . . . C | . G G . | T G . | (15) | ( <i>N. greenwoodi</i> ) |       |
| Nm28  | . . . C | . G G . | T G . | (15) | ( <i>N. greenwoodi</i> ) |       |
| Nm30  | . . . Y | . G G . | T G . | (15) | ( <i>N. greenwoodi</i> ) |       |
| Nm31  | . . . C | . G G . | T G . | (15) | ( <i>N. greenwoodi</i> ) |       |
| Nm5   | . . . . | G G .   | T G . | (15) | ( <i>N. greenwoodi</i> ) |       |
| Nm7   | . . . C | . G G . | T G . | (15) | ( <i>N. greenwoodi</i> ) |       |
| 13846 | . . . C | . G G . | T G . | (15) | ( <i>N. greenwoodi</i> ) |       |
| 13851 | . . . C | . G G . | T G . | (15) | ( <i>N. greenwoodi</i> ) |       |
| 13852 | . . . C | . G G . | T G . | (15) | ( <i>N. greenwoodi</i> ) |       |
| 13853 | . . . Y | . G G . | T G . | (15) | ( <i>N. greenwoodi</i> ) |       |
| 13855 | . . . . | G G .   | T G . | (15) | ( <i>N. greenwoodi</i> ) | H=50  |
| 13857 | . . . . | G G .   | T G . | (15) | ( <i>N. greenwoodi</i> ) |       |
| 13882 | . . . C | . G G . | T G . | (15) | ( <i>N. greenwoodi</i> ) |       |
| 13883 | . . . C | . G G . | T G . | (15) | ( <i>N. greenwoodi</i> ) |       |
| 13884 | . . . . | G G .   | T G . | (15) | ( <i>N. greenwoodi</i> ) |       |
| 13888 | . . . . | G G .   | T G . | (15) | ( <i>N. greenwoodi</i> ) |       |
| 13889 | . . . . | G G .   | T G . | (15) | ( <i>N. greenwoodi</i> ) |       |
| 13896 | . . . C | . G G . | T G . | (15) | ( <i>N. greenwoodi</i> ) |       |
| 13897 | . . . . | G G .   | T G . | (15) | ( <i>N. greenwoodi</i> ) |       |
| 13899 | . . . Y | . G G . | T G . | (15) | ( <i>N. greenwoodi</i> ) |       |
| 13900 | . . . Y | . G G . | T G . | (15) | ( <i>N. greenwoodi</i> ) |       |
| 13901 | . . . C | . G G . | T G . | (15) | ( <i>N. greenwoodi</i> ) |       |
| 13903 | . . . C | . G G . | T G . | (15) | ( <i>N. greenwoodi</i> ) |       |

|      |   |   |   |   |   |   |   |   |   |   |      |                          |
|------|---|---|---|---|---|---|---|---|---|---|------|--------------------------|
| Ma10 | . | . | Y | . | G | G | . | T | G | . | (10) | <i>(N. omnicaruleus)</i> |
| Ma11 | . | . | . | . | G | G | . | T | G | . | (10) | <i>(N. omnicaruleus)</i> |
| Ma12 | . | . | C | . | G | G | . | T | G | . | (10) | <i>(N. omnicaruleus)</i> |
| Ma13 | . | . | Y | . | G | G | . | T | G | . | (10) | <i>(N. omnicaruleus)</i> |
| Ma34 | . | . | . | . | G | G | . | T | G | . | (10) | <i>(N. omnicaruleus)</i> |
| MaA  | . | . | C | . | G | G | . | T | G | . | (10) | <i>(N. omnicaruleus)</i> |
| MaB  | . | . | . | . | G | G | . | T | G | . | (10) | <i>(N. omnicaruleus)</i> |
| MaC  | . | . | . | . | G | G | . | T | G | . | (10) | <i>(N. omnicaruleus)</i> |
| MaD  | . | . | . | . | G | G | . | T | G | . | (10) | <i>(N. omnicaruleus)</i> |
| MaE  | . | . | . | . | G | G | . | T | G | . | (10) | <i>(N. omnicaruleus)</i> |
| MaG  | . | . | . | . | G | G | . | T | G | . | (10) | <i>(N. omnicaruleus)</i> |
| MaH  | . | . | . | . | G | G | . | T | G | . | (10) | <i>(N. omnicaruleus)</i> |
| MaI  | . | . | Y | . | G | G | . | T | G | . | (10) | <i>(N. omnicaruleus)</i> |
| MaJ  | . | . | Y | . | G | G | . | T | G | . | (10) | <i>(N. omnicaruleus)</i> |
| MaK  | . | . | . | . | G | G | . | T | G | . | (10) | <i>(N. omnicaruleus)</i> |
| MaL  | . | . | . | . | G | G | . | T | G | . | (10) | <i>(N. omnicaruleus)</i> |
| MaM  | . | . | . | . | G | G | . | T | G | . | (10) | <i>(N. omnicaruleus)</i> |
| MaN  | . | . | . | . | G | G | . | T | G | . | (10) | <i>(N. omnicaruleus)</i> |
| MaO  | . | . | Y | . | G | G | . | T | G | . | (10) | <i>(N. omnicaruleus)</i> |
| MaP  | . | . | . | . | G | G | . | T | G | . | (10) | <i>(N. omnicaruleus)</i> |

|            |   |   |   |   |   |   |   |   |   |
|------------|---|---|---|---|---|---|---|---|---|
| amino acid | 4 | 1 | 1 | 1 | 1 | 2 | 2 | 2 | 2 |
| positions  | 4 | 5 | 6 | 7 | 7 | 3 | 7 | 7 | 8 |
|            | 0 | 8 | 7 | 9 | 0 | 5 | 5 | 2 |   |
| I          | I | A | S | F | T | C | T |   |   |
| M          | A | G | A | V | A | I | A |   |   |

H=40
