# Supplementary material for: Divergent Selection on Opsins Drives Incipient Speciation in Lake Victoria Cichlids
Source: PubMed Central journal article supplement (PMC1750929; doi:10.1371/journal.pbio.0040433), 2006-12-05
Supplement: pbio.0040433.sg003.pdf [file pbio.0040433.sg003.pdf]

| nucleotide sites |         | 1 | 3 | 4 | 5 | 5 | 6 | 6 | 6 | 8 | 8 | 8 | 8 |   |
|------------------|---------|---|---|---|---|---|---|---|---|---|---|---|---|---|
| syn/non-syn      |         | n | n | s | n | n | n | n | n | n | n | n | s |   |
| M. mbipi         | MaI     | C | A | C | G | G | C | T | G | G | T | G | G | C |
|                  | MaII    | . | . | . | . | . | . | . | . | . | . | . | . | . |
|                  | MaIII   | . | . | . | . | . | . | . | . | . | . | R | . | . |
|                  | Ma15    | . | . | . | . | . | . | . | . | . | . | R | . | . |
|                  | Ma24    | . | . | T | . | . | . | . | . | . | . | . | . | . |
|                  | Ma8     | . | . | T | . | . | . | . | . | . | . | . | . | . |
|                  | Ma9     | . | . | . | . | . | . | . | . | . | . | R | . | . |
|                  | Ma2080  | . | . | T | . | . | . | . | . | . | . | . | . | . |
|                  | Ma2084  | . | . | T | . | . | . | . | . | . | . | . | . | . |
|                  | Ma2087  | . | . | Y | . | . | . | . | . | . | . | R | . | . |
|                  | Ma2088  | . | . | T | . | . | . | . | . | . | . | . | . | . |
|                  | Ma2089  | . | . | T | . | . | . | . | . | . | . | . | . | . |
|                  | Ma2090  | . | . | T | . | . | . | . | . | . | . | . | . | . |
|                  | Ma2093  | . | . | T | . | . | . | . | . | . | . | . | . | . |
|                  | Ma2110  | . | . | T | . | . | . | . | . | . | . | . | . | . |
|                  | Ig10    | . | . | T | . | . | . | . | . | . | . | . | . | . |
|                  | Ig12    | . | . | T | K | . | . | . | R | W | K | . | . | . |
|                  | Ig52    | G | . | T | . | . | . | . | . | . | . | . | . | . |
|                  | Ig53    | . | . | T | . | . | . | . | . | . | . | . | . | . |
|                  | Ig54    | . | . | T | . | . | . | . | . | . | . | . | . | . |
|                  | Se39    | . | . | T | . | . | . | . | . | . | . | . | . | . |
|                  | hi025   | . | . | T | . | . | . | . | A | A | T | . | . | . |
|                  | hi143   | . | . | T | . | . | . | . | . | . | . | . | . | . |
|                  | hi144   | . | . | T | . | . | . | . | A | A | T | . | . | . |
|                  | hi153   | . | . | T | . | . | . | . | R | W | K | . | . | . |
|                  | hi154   | . | . | T | . | . | . | . | . | . | . | . | . | . |
|                  | hi160   | . | M | T | . | . | . | . | . | . | . | . | . | . |
|                  | hi161   | . | . | T | . | . | . | . | . | . | . | . | . | . |
|                  | hi162   | . | . | T | . | . | . | . | . | . | . | . | . | . |
|                  | hi163   | . | . | . | . | . | . | . | . | . | . | . | . | . |
|                  | hi165   | . | . | T | . | . | . | . | A | A | T | . | . | . |
|                  | hi198   | . | . | Y | . | . | . | . | . | . | . | . | . | . |
|                  | hi200   | . | . | . | . | . | . | . | . | . | . | . | . | . |
|                  | HiI     | . | . | T | . | . | . | . | . | . | . | . | . | . |
|                  | HiIII   | . | . | T | . | . | . | . | . | . | . | . | . | . |
|                  | HiIIII  | . | . | T | . | . | . | . | R | W | K | . | . | . |
|                  | HiIIIII | . | . | T | . | . | . | . | . | . | . | . | . | . |
|                  | Py10    | . | . | . | . | . | . | . | . | . | . | . | . | . |
|                  | Py100   | . | . | T | . | . | . | . | A | A | T | . | . | . |
|                  | Py118   | . | . | T | . | . | . | . | A | A | T | . | . | . |
|                  | Py139   | . | . | T | . | . | . | . | A | A | T | . | . | . |
|                  | Py151   | . | . | T | . | M | W | R | W | K | . | Y | . | . |
|                  | Py169   | . | . | T | . | . | . | . | A | A | T | . | . | . |
|                  | Py179   | . | . | . | . | . | . | . | . | . | . | . | . | . |
|                  | Py205   | . | . | . | . | . | . | . | R | W | K | . | . | . |
|                  | Py206   | . | . | . | . | . | . | . | R | W | K | . | . | . |
|                  | Py215   | . | . | Y | . | . | . | . | R | W | K | . | . | . |
|                  | Py216   | . | . | T | . | . | . | . | A | A | T | . | . | . |
|                  | Py231   | . | . | Y | . | . | . | . | R | W | K | . | . | . |
|                  | Py232   | . | . | T | . | . | . | . | A | A | T | . | . | . |
|                  | Py28    | . | . | T | . | . | . | . | A | A | T | . | . | . |
|                  | PyI     | . | . | T | . | . | . | . | A | A | T | . | . | . |
|                  | PyII    | . | . | T | . | M | A | A | W | K | . | Y | . | . |
|                  | PyIII   | . | . | T | . | . | . | . | A | A | T | . | . | . |
|                  | PyIIII  | . | . | T | . | . | . | . | A | A | T | . | . | . |
| N. omniceruleus  | Ma      | . | . | T | . | . | . | . | . | . | . | . | . | . |
| N. greenwoodi    | Mr      | . | . | T | T | . | . | . | A | T | . | . | . | . |

Station

Number of sequences  
per allele group

10

H=30

11

H=9  
other=1

13

H=2

7

H=24  
M3=8

5

H=9  
M3=26  
other=1
