# Supplementary material for: Divergent Selection on Opsins Drives Incipient Speciation in Lake Victoria Cichlids
Source: PubMed Central journal article supplement (PMC1750929; doi:10.1371/journal.pbio.0040433), 2006-12-05
Supplement: pbio.0040433.sg005.pdf [file pbio.0040433.sg005.pdf]

|                         |        | 1 | 4 | 5 | 5 | 5 | 6 | 6 | 6 | 7 | 8 | 8 | 8 | 0 |    |
|-------------------------|--------|---|---|---|---|---|---|---|---|---|---|---|---|---|----|
| nucleotide sites        |        | 5 | 6 | 2 | 2 | 3 | 4 | 4 | 8 | 9 | 2 | 2 | 4 | 2 |    |
| syn/non-syn             |        | 2 | 5 | 3 | 9 | 5 | 5 | 7 | 8 | 4 | 3 | 4 | 4 | 2 |    |
|                         |        | n | s | n | n | n | s | n | n | n | n | n | n | n |    |
| <i>P. pundamilia</i>    | By17   | A | T | G | G | G | T | A | G | A | T | A | G |   |    |
|                         | Mr10   | . | . | . | . | . | . | . | . | . | . | . | . |   |    |
|                         | Mr12   | . | . | . | . | . | . | . | . | . | . | . | . | 2 |    |
|                         | Mr40   | . | . | . | . | . | . | . | . | . | . | . | . |   |    |
|                         | Mr41   | . | . | . | . | . | . | . | . | . | . | . | . |   |    |
|                         | Mr42   | . | . | . | . | . | . | . | . | . | . | . | . |   |    |
|                         | Lu21   | . | . | . | . | . | . | . | . | . | . | . | . |   |    |
|                         | Lu30   | . | . | . | . | . | . | . | . | . | . | . | . | 4 |    |
|                         | Lu7    | . | . | . | . | . | . | . | . | . | . | . | . |   |    |
|                         | Lu9    | . | . | . | . | . | . | . | . | . | . | . | . |   |    |
|                         | Mt48   | . | . | . | . | . | . | . | . | . | . | . | . | 3 |    |
|                         | Mt54   | . | . | . | . | . | . | . | . | . | . | . | . |   |    |
|                         | Py117  | . | . | . | . | . | . | W | R | . | G | . | . | 5 |    |
|                         | Py122  | . | . | . | . | . | . | . | . | . | . | . | . |   |    |
|                         | Py123  | . | . | . | K | K | . | W | R | . | . | . | . |   |    |
|                         | Py20   | . | . | . | . | . | . | . | . | . | . | . | . |   |    |
|                         | Py58   | . | . | . | . | . | . | . | . | . | . | . | . |   |    |
|                         | Py59   | . | . | . | . | . | . | . | . | . | . | . | . |   |    |
|                         | Py63   | . | . | . | . | . | . | . | . | . | . | . | . |   |    |
|                         | Py64   | . | . | . | . | . | . | . | . | . | . | . | . |   |    |
|                         | Py65   | . | . | . | . | . | . | . | . | . | . | . | . |   |    |
|                         | Ks1    | . | . | . | . | . | . | . | . | . | . | . | . |   | 6  |
|                         | Ks29   | . | . | . | . | . | . | . | . | . | . | . | . |   |    |
|                         | Ks2    | . | . | . | . | . | . | . | . | . | . | . | . |   |    |
|                         | Ks8    | . | . | . | . | . | . | . | . | . | . | . | . |   |    |
|                         | Bw6    | . | . | R | . | . | S | W | . | . | . | R | . | 9 |    |
|                         | Bw7    | . | . | . | . | . | C | A | R | R | W | K | R |   | .  |
|                         | Bw8    | . | . | R | . | . | C | A | . | . | . | G | . |   | .  |
|                         | Ig13   | . | . | . | . | . | . | . | . | . | . | . | R | . | 11 |
|                         | Ig39   | . | Y | . | . | . | C | A | R | R | W | K | R | . |    |
|                         | Ig40   | . | . | . | . | . | C | A | . | . | . | G | . | . |    |
|                         | Ju1    | . | . | . | . | . | . | . | . | . | . | . | A | . | 8  |
|                         | Ju2    | R | . | . | . | . | . | . | . | . | . | . | R | . |    |
|                         | Ju30   | . | . | . | . | . | S | W | . | R | . | . | R | R |    |
|                         | Ma3411 | . | . | . | . | . | . | . | . | . | . | . | . | . | 10 |
|                         | Ma341  | . | . | . | . | . | . | . | . | . | . | . | . | . |    |
|                         | Ma5893 | . | . | . | . | . | . | . | . | . | . | . | . | . |    |
|                         | Ma5    | . | . | . | . | . | . | . | . | . | . | . | . | . |    |
|                         | Ma92   | . | . | . | . | . | . | . | . | . | . | . | . | . |    |
|                         | Ru27   | . | . | R | . | . | . | . | . | . | . | . | . | . |    |
|                         | Ru28   | . | . | A | . | . | . | . | . | . | . | . | . | . | 12 |
|                         | Ru29   | . | . | A | . | . | . | . | . | . | . | . | . | . |    |
|                         | Ru37   | . | . | . | . | . | C | A | R | . | W | K | . | . |    |
|                         |        | . | . | . | . | . | . | . | . | . | . | . | . | . |    |
| <i>N. omnicaeruleus</i> | Ma     | . | . | . | . | . | C | A | G | . | T | G | . | . |    |
| <i>N. greenwoodi</i>    | Mr     | . | . | . | T | T | C | A | G | . | . | . | . | . |    |

Station

Number of sequences  
per allele group

1

P=2

2

P=10

4

P=8

3

P=4

5

P=14  
other=4

6

P=8

9

P=1  
other=5

11

P=2  
other=4

8

P=5  
other=1

10

P=10

12

P=6  
other=2
