# Supplementary material for: Divergent Selection on Opsins Drives Incipient Speciation in Lake Victoria Cichlids
Source: PubMed Central journal article supplement (PMC1750929; doi:10.1371/journal.pbio.0040433), 2006-12-05
Supplement: pbio.0040433.sg006.pdf [file pbio.0040433.sg006.pdf]

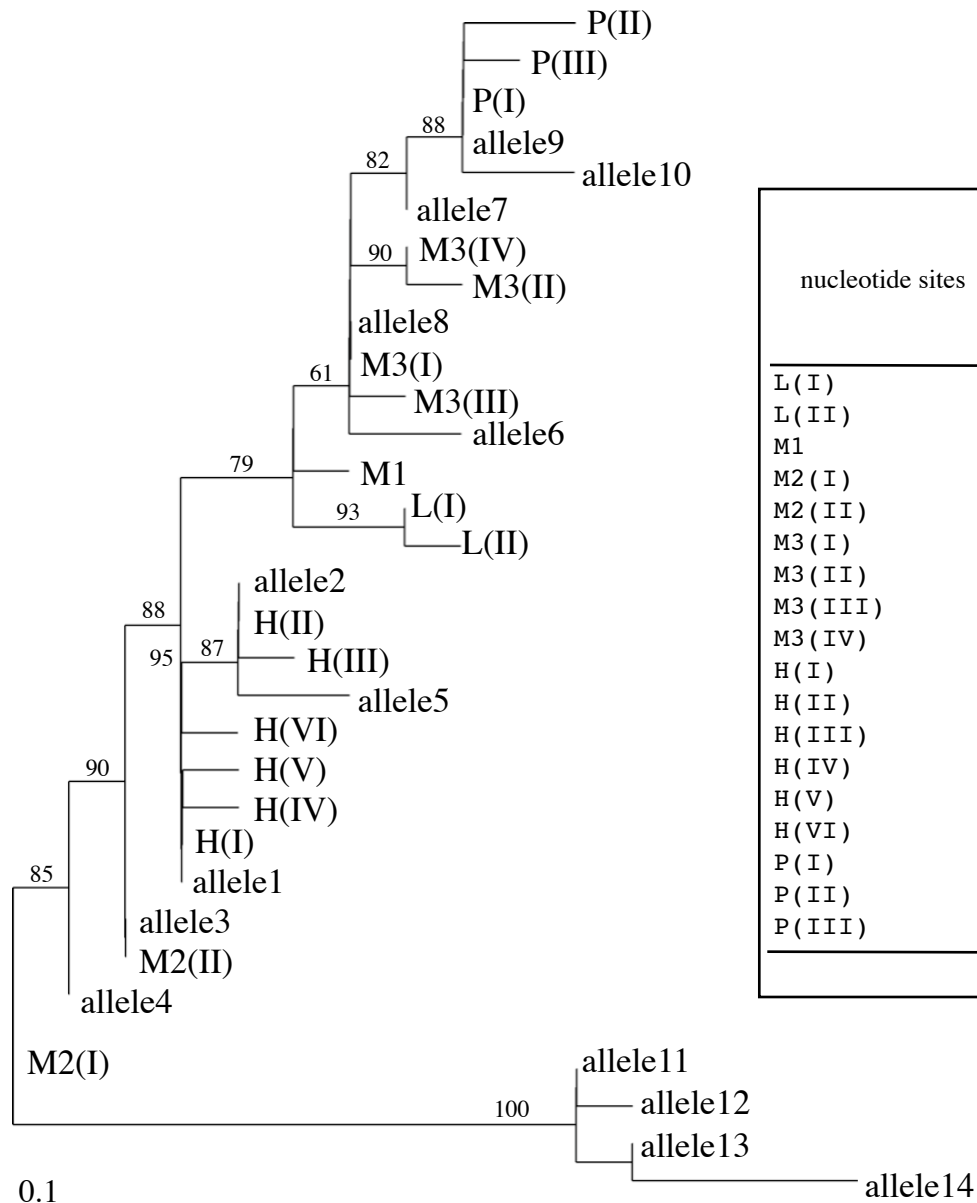

| nucleotide sites | 1344555566666888880  | 3746022344678222492 | 9095339557498346412 |                      |                        |                 |                      |
|------------------|----------------------|---------------------|---------------------|----------------------|------------------------|-----------------|----------------------|
|                  |                      |                     |                     | <i>N. greenwoodi</i> | <i>N. rufocaudalis</i> | <i>M. mbipi</i> | <i>P. pundamilia</i> |
| L (I)            | CATTCGTTCACTGATGACG  |                     |                     | 30                   | 2                      |                 |                      |
| L (II)           | ..G.....             |                     |                     | 0.4                  |                        |                 |                      |
| M1               | .....GG.....G..      |                     |                     | 0.4                  |                        |                 |                      |
| M2 (I)           | ....G.....TG....     |                     |                     | 10                   |                        |                 |                      |
| M2 (II)          | .....G.....TG....    |                     |                     | 1                    | 1                      |                 |                      |
| M3 (I)           | .....GG....A.....    |                     |                     |                      |                        |                 | 22                   |
| M3 (II)          | .....GG..AAA.....    |                     |                     |                      |                        |                 | 1                    |
| M3 (III)         | ...C..GG....A.....   |                     |                     |                      |                        |                 | 2                    |
| M3 (IV)          | .....GG....AA.....   |                     |                     |                      |                        |                 | 1                    |
| H (I)            | .....GG.....TG....   |                     |                     | 38                   | 94                     | 49              |                      |
| H (II)           | ...C..GG.....TG....  |                     |                     | 19                   | 3                      | 18              |                      |
| H (III)          | ...C..GG.....TGA...  |                     |                     |                      |                        |                 | 4                    |
| H (IV)           | G.....GG.....TG....  |                     |                     |                      |                        |                 | 2                    |
| H (V)            | .C.....GG.....TG.... |                     |                     |                      |                        |                 | 1                    |
| H (VI)           | .....GG.....TG..T.   |                     |                     |                      |                        |                 | 1                    |
| P (I)            | .....GGGT..A.....    |                     |                     |                      |                        |                 | 67                   |
| P (II)           | .....GGGT..A.....A   |                     |                     |                      |                        |                 | 5                    |
| P (III)          | .....AGGGT..A.....   |                     |                     |                      |                        |                 | 6                    |
