# Supplementary material for: Divergent Selection on Opsins Drives Incipient Speciation in Lake Victoria Cichlids
Source: PubMed Central journal article supplement (PMC1750929; doi:10.1371/journal.pbio.0040433), 2006-12-05
Supplement: pbio.0040433.st001.pdf [file pbio.0040433.st001.pdf]

**Table S1. FST values for polymorphic neutral markers**

| populations**     | polymorphic loci* |        |        |                 |
|-------------------|-------------------|--------|--------|-----------------|
|                   | 1801              | 1918   | 1807   | average (S. E.) |
| Marumbi-Namatembi | 0.0420            | 0.0400 | 0.0460 | 0.043±0.0024    |
| Marumbi-Makobe    | 0.0006            | 0.0920 | 0.0037 | 0.032±0.042     |
| Namatembi-Makobe  | 0.0340            | 0.0120 | 0.0036 | 0.017±0.013     |

\*SINE insertion polymorphic loci [1]

\*\*The number of individuals; *N. greenwoodi*: n=29 at Marumbi, n=25 at Namatemi; *N. omniceruleus*, n=20 at Makobe

1.Terai Y, Takezaki N, Mayer WE, Tichy H, Takahata N, et al. (2004) Phylogenetic relationships among East African haplochromine fishes as revealed by short interspersed elements (SINEs). J Mol Evol 581: 64-78.
