# Supplementary material for: Divergent Selection on Opsins Drives Incipient Speciation in Lake Victoria Cichlids
Source: PubMed Central journal article supplement (PMC1750929; doi:10.1371/journal.pbio.0040433), 2006-12-05
Supplement: pbio.0040433.st002.pdf [file pbio.0040433.st002.pdf]

**Table S2. HKA test for the statistical significance (p) of heterogeneity between regions**

| population | outgroup  | regions           |                     |                     |
|------------|-----------|-------------------|---------------------|---------------------|
|            |           | upstream-LWS gene | downstream-LWS gene | upstream-downstream |
| Marumbi    | Makobe    | 0.0379*           | 0.1099              | 0.6817              |
| Marumbi    | Namatembi | 0.0303*           | 0.0561              | 0.8342              |
| Makobe     | Marumbi   | 0.0043**          | 0.0010**            | 0.8342              |
| Makobe     | Namatembi | 0.1996            | 0.1806              | 0.9029              |
| Namatembi  | Marumbi   | 0.0024**          | 0.0004***           | 0.5592              |
| Namatembi  | Makobe    | 0.6369            | 0.5577              | 0.3688              |

\*0.01<p<0.05, \*\*0.001<p<0.01, \*\*\*p<0001

The up and downstream regions, described in Figure 2, are used as neutral regions. The p values indicate the statistical significance for the comparison of the ratio of polymorphism within a population to divergence from outgroup (single sequence from outgroup population) between the *LWS* gene region (test region) and up and downstream regions (neutral regions).
